# Supplementary material
Source: PubMed Central journal article supplement (PMC9857588)
Supplement: jamaneurol-e224352-s001.pdf [file jamaneurol-e224352-s001.pdf]

## Supplemental Online Content

Galovic M, Al-Diwani A, Vivekananda U, Walker MC, Irani SR, Koepp MJ; NEST Investigators. In vivo *N*-methyl-D-aspartate receptor (NMDAR) density as assessed using positron emission tomography during recovery from NMDAR-antibody encephalitis. *JAMA Neurol*. Published online December 5, 2022. doi:10.1001/jamaneurol.2022.4352

**eTable.** Characteristics of Patients With N-Methyl-D-Aspartate Receptor-Antibody Encephalitis

This supplemental material has been provided by the authors to give readers additional information about their work.

**eTable.** Characteristics of Patients With *N*-Methyl-D-Aspartate Receptor-Antibody Encephalitis

| Variable                                             | Case #1                                        | Case #2                                     | Case #3                                    | Case #4        | Case #5                                    |
|------------------------------------------------------|------------------------------------------------|---------------------------------------------|--------------------------------------------|----------------|--------------------------------------------|
| <b>Age-range (years), Sex</b>                        | 20-25, F                                       | 35-40, F                                    | 20-25, F                                   | 30-35, F       | 25-30, F                                   |
| <b>Data at scan</b>                                  |                                                |                                             |                                            |                |                                            |
| GE-179 V <sub>T</sub> in GM                          | 7.3                                            | 6.6                                         | 6.0                                        | 4.6            | 9.7                                        |
| Serum GluN1-IgG                                      | 1:320                                          | 1:320                                       | 1:160                                      | 1:320          | Not detectable                             |
| Current episode                                      | Relapse                                        | Relapse                                     | First                                      | First          | First                                      |
| Overall number of episodes                           | 3                                              | 2                                           | 1                                          | 1              | 1                                          |
| ACE-III                                              | 96                                             | 95                                          | 86                                         | 96             | 96                                         |
| BDI                                                  | 16                                             | 3                                           | 8                                          | 6              | 5                                          |
| <b>Timing</b>                                        |                                                |                                             |                                            |                |                                            |
| Time from discharge to scan ( <i>months</i> )        | 2                                              | 8                                           | 6                                          | 8              | 16                                         |
| Duration of hospitalization ( <i>months</i> )        | 1.5                                            | 1.3                                         | 10                                         | 2.5            | 2                                          |
| Time from episode onset to admission ( <i>days</i> ) | 14                                             | 21                                          | 64                                         | 12             | 25                                         |
| Time from episode onset to scan ( <i>months</i> )    | 4                                              | 12                                          | 18                                         | 11             | 19                                         |
| <b>Treatment</b>                                     |                                                |                                             |                                            |                |                                            |
| Medication at time of PET scan                       | CP, Prednisone, Lorazepam, TMP/SMX, Omeprazole | Levetiracetam, Clonazepam, Ferrous fumarate | Prednisone, Lansoprazole                   | Levetiracetam  | Oral contraceptive                         |
| Immunotherapy during hospitalisation                 | Steroids, PLEX, CP                             | Steroids, PLEX, CP                          | Steroids, PLEX, IVIG                       | Steroids, PLEX | Steroids, PLEX, IVIG, CP                   |
| Other treatments during hospitalisation              | Antipsychotic, Benzodiazepine                  | Antipsychotic, Antiseizure, Benzodiazepine  | Antipsychotic, Antiseizure, Benzodiazepine | Antiseizure    | Antipsychotic, Antiseizure, Benzodiazepine |
| <b>Clinical features during hospitalisation</b>      |                                                |                                             |                                            |                |                                            |
| CASE score at discharge                              | 5                                              | 4                                           | 5                                          | 5              | 8                                          |
| Prodrome                                             | Y                                              | Y                                           | Y                                          | Y              | Y                                          |
| Psychiatric                                          | Y                                              | Y                                           | Y                                          | Y              | Y                                          |
| Cognitive                                            | Y                                              | Y                                           | Y                                          | Y              | Y                                          |
| Speech dysfunction                                   | Y                                              | Y                                           | N                                          | Y              | Y                                          |
| Seizures                                             | N                                              | N                                           | Y                                          | Y              | Y                                          |
| Movement disorder                                    | Y                                              | Y                                           | Y                                          | Y              | Y                                          |
| Reduced consciousness                                | N                                              | N                                           | Y                                          | Y              | N                                          |
| Autonomic                                            | Y                                              | N                                           | N                                          | N              | Y                                          |
| Central hypoventilation                              | N                                              | N                                           | N                                          | N              | N                                          |
| Ovarian teratoma                                     | N                                              | N                                           | Y                                          | Y              | N                                          |
| Post-HSV encephalitis                                | N                                              | N                                           | N                                          | N              | N                                          |
| <b>Para-clinical features during hospitalisation</b> |                                                |                                             |                                            |                |                                            |
| MRI abnormal                                         | N                                              | N                                           | N                                          | N              | N                                          |
| EEG abnormal                                         | Y                                              | Y                                           | Y                                          | Y              | ?                                          |
| CSF GluN1-IgG                                        | Y                                              | Y                                           | Y                                          | Y              | Y                                          |
| CSF pleocytosis                                      | Y                                              | Y                                           | N                                          | N              | Y                                          |
| CSF lymphocytosis                                    | Y                                              | Y                                           | Y                                          | Y              | Y                                          |
| CSF elevated protein                                 | Y                                              | Y                                           | N                                          | N              | Y                                          |

Y, Yes/Present; N, No/Absent; ?, unknown; F, female; CM, Grey matter; ACE-III, Addenbrooke's Cognitive Examination III; BDI, Beck's Depression Inventory; CP, Cyclophosphamide, TMP/SMX, Trimethoprim/sulfamethoxazole; PLEX, Plasma exchange; IVIG, Intravenous immunoglobulins; HSV, Herpes simplex virus; MRI, Magnetic resonance imaging; EEG, Electroencephalography; CSF, Cerebrospinal fluid examination.
